# Supplementary material for: Investigating the Effectiveness and Acceptability of Oral Health and Related Health Behaviour Interventions in Adults with Severe and Multiple Disadvantage: Protocol for a Mixed-Methods Systematic Review
Source: MDPI journal article supplement (doi:10.3390/ijerph182111554), 2021-11-03
Supplement: s1 [file s1]

## Search Strategy:

| #  | Searches                                                                                                                                                                                                                                                                                                                                                                                                                                                                                                                                                                                                                                                                                                          | Results |
|----|-------------------------------------------------------------------------------------------------------------------------------------------------------------------------------------------------------------------------------------------------------------------------------------------------------------------------------------------------------------------------------------------------------------------------------------------------------------------------------------------------------------------------------------------------------------------------------------------------------------------------------------------------------------------------------------------------------------------|---------|
| 1  | Oral Hygiene/                                                                                                                                                                                                                                                                                                                                                                                                                                                                                                                                                                                                                                                                                                     | 12877   |
| 2  | Mouth Rehabilitation/                                                                                                                                                                                                                                                                                                                                                                                                                                                                                                                                                                                                                                                                                             | 1441    |
| 3  | Oral Health/                                                                                                                                                                                                                                                                                                                                                                                                                                                                                                                                                                                                                                                                                                      | 16531   |
| 4  | exp Dental Health Services/                                                                                                                                                                                                                                                                                                                                                                                                                                                                                                                                                                                                                                                                                       | 38102   |
| 5  | ((dental or oral or tooth or teeth or mouth) adj3 (health or care or hygiene or rehabilitation)).ti,ab,kw.                                                                                                                                                                                                                                                                                                                                                                                                                                                                                                                                                                                                        | 60600   |
| 6  | or/1-5                                                                                                                                                                                                                                                                                                                                                                                                                                                                                                                                                                                                                                                                                                            | 93064   |
| 7  | Smoking/                                                                                                                                                                                                                                                                                                                                                                                                                                                                                                                                                                                                                                                                                                          | 139967  |
| 8  | (smoking or cigarette* or tobacco).ti,ab,kw.                                                                                                                                                                                                                                                                                                                                                                                                                                                                                                                                                                                                                                                                      | 301651  |
| 9  | exp "Tobacco Use"/                                                                                                                                                                                                                                                                                                                                                                                                                                                                                                                                                                                                                                                                                                | 4637    |
| 10 | Alcohol Drinking/                                                                                                                                                                                                                                                                                                                                                                                                                                                                                                                                                                                                                                                                                                 | 66976   |
| 11 | Alcoholism/                                                                                                                                                                                                                                                                                                                                                                                                                                                                                                                                                                                                                                                                                                       | 75008   |
| 12 | Alcoholics/                                                                                                                                                                                                                                                                                                                                                                                                                                                                                                                                                                                                                                                                                                       | 846     |
| 13 | (alcoholic* adj3 (person or people or adult or parent* or family)).ti,ab,kw.                                                                                                                                                                                                                                                                                                                                                                                                                                                                                                                                                                                                                                      | 891     |
| 14 | "street drink*".ti,ab,kw.                                                                                                                                                                                                                                                                                                                                                                                                                                                                                                                                                                                                                                                                                         | 8       |
| 15 | exp Substance-Related Disorders/                                                                                                                                                                                                                                                                                                                                                                                                                                                                                                                                                                                                                                                                                  | 278311  |
| 16 | exp Drug users/                                                                                                                                                                                                                                                                                                                                                                                                                                                                                                                                                                                                                                                                                                   | 3151    |
| 17 | Behavior, Addictive/                                                                                                                                                                                                                                                                                                                                                                                                                                                                                                                                                                                                                                                                                              | 9847    |
| 18 | ((alcohol or drug* or substance*) adj2 (misuse* or abuse* or use* or addict* or dependenc* or issue* or problem*)).ti,ab,kw.                                                                                                                                                                                                                                                                                                                                                                                                                                                                                                                                                                                      | 270673  |
| 19 | (drug adj1 (habit or tak* or hard or illicit or inject*)).ti,ab,kw.                                                                                                                                                                                                                                                                                                                                                                                                                                                                                                                                                                                                                                               | 22884   |
| 20 | or/7-19                                                                                                                                                                                                                                                                                                                                                                                                                                                                                                                                                                                                                                                                                                           | 772910  |
| 21 | ((sugar or sucrose or fructose or glucose) adj2 (intake or consum*)).ti,ab,kw.                                                                                                                                                                                                                                                                                                                                                                                                                                                                                                                                                                                                                                    | 13709   |
| 22 | diet*.ti,ab,kw.                                                                                                                                                                                                                                                                                                                                                                                                                                                                                                                                                                                                                                                                                                   | 570917  |
| 23 | "sugary food*".ti,ab,kw.                                                                                                                                                                                                                                                                                                                                                                                                                                                                                                                                                                                                                                                                                          | 232     |
| 24 | exp Dietary Sugars/ or Diet/                                                                                                                                                                                                                                                                                                                                                                                                                                                                                                                                                                                                                                                                                      | 163303  |
| 25 | ((processed or acidic) adj1 food*).ti,ab,kw.                                                                                                                                                                                                                                                                                                                                                                                                                                                                                                                                                                                                                                                                      | 3684    |
| 26 | ((sugary or fizzy or carbonated or soft) adj1 drink*).ti,ab,kw.                                                                                                                                                                                                                                                                                                                                                                                                                                                                                                                                                                                                                                                   | 4468    |
| 27 | carbonated beverages/ or sugar-sweetened beverages/                                                                                                                                                                                                                                                                                                                                                                                                                                                                                                                                                                                                                                                               | 2994    |
| 28 | soda.ti,ab,kw.                                                                                                                                                                                                                                                                                                                                                                                                                                                                                                                                                                                                                                                                                                    | 4176    |
| 29 | or/21-28                                                                                                                                                                                                                                                                                                                                                                                                                                                                                                                                                                                                                                                                                                          | 638090  |
| 30 | (severe and multiple disadvantage*).ti,ab,kw.                                                                                                                                                                                                                                                                                                                                                                                                                                                                                                                                                                                                                                                                     | 4       |
| 31 | Homeless Persons/                                                                                                                                                                                                                                                                                                                                                                                                                                                                                                                                                                                                                                                                                                 | 7743    |
| 32 | homeless*.ti,ab,kw.                                                                                                                                                                                                                                                                                                                                                                                                                                                                                                                                                                                                                                                                                               | 10756   |
| 33 | ((hous* or home* or accommodat* or shelter) adj3 (insecur* or instability or unstable or stability)).ti,ab,kw.                                                                                                                                                                                                                                                                                                                                                                                                                                                                                                                                                                                                    | 2860    |
| 34 | or/30-33                                                                                                                                                                                                                                                                                                                                                                                                                                                                                                                                                                                                                                                                                                          | 14901   |
| 35 | ((probationer* or parolee* or ((repeat* or ex or re or revolving door or habitual or multiple or former* or previously*) adj1 (offen* or convict* or prisoner* or imprison* or incarcerat* or criminal*)) or (former adj3 inmate*) or ((community or probation* or parole* or reintegrat*) adj4 (prison* or offender* or criminal* or convict* or inmate*)) or ((individuals or men or women) adj2 (probation or parole)) or ((reintegrate* or reent* or return*) adj3 community)).ti,ab,kw.                                                                                                                                                                                                                      | 3938    |
| 36 | "criminal justice".ti,ab,kw.                                                                                                                                                                                                                                                                                                                                                                                                                                                                                                                                                                                                                                                                                      | 4331    |
| 37 | or/35-36                                                                                                                                                                                                                                                                                                                                                                                                                                                                                                                                                                                                                                                                                                          | 7796    |
| 38 | ((program* or policy or policies or strateg* or scheme* or project* or initiative* or "care package" or training or educat* or pilot or guidance or guideline* or study or pathway or treatment* or promot* or management or "support group" or process* or trial* or intervention*) adj5 (evaluat* or effect* or measur* or assess* or experiment* or impact* or feasab* or acceptab* or efficacy or perception* or belief* or uptake or consequence* or attitud* or barrier* or facilit* or motivat* or experience* or implement* or adher* or retention or retain* or reduc* or increas* or improv* or outcome* or cost* or benefit* or interview* or qualitative or ethnograph* or "focus group*")).ti,ab,kw. | 4389024 |
| 39 | "housing first".ti,ab,kw.                                                                                                                                                                                                                                                                                                                                                                                                                                                                                                                                                                                                                                                                                         | 299     |
| 40 | (outcome* adj5 evaluat*).ti,ab,kw.                                                                                                                                                                                                                                                                                                                                                                                                                                                                                                                                                                                                                                                                                | 82642   |
| 41 | or/38-40                                                                                                                                                                                                                                                                                                                                                                                                                                                                                                                                                                                                                                                                                                          | 4421408 |
| 42 | (34 or 37) and (6 or 20 or 29)                                                                                                                                                                                                                                                                                                                                                                                                                                                                                                                                                                                                                                                                                    | 8338    |
| 43 | 41 and 42                                                                                                                                                                                                                                                                                                                                                                                                                                                                                                                                                                                                                                                                                                         | 3961    |

1. Ecological momentary **assessment** of daily **drug use** and harm **reduction** service utilization among **people** who **inject drugs** in non-urban areas: A concurrent mixed-method feasibility **study**.

Biello K; Salhaney P; Valente PK; Childs E; Olson J; Earlywine JJ; Marshall BD; R Bazzi A.

*Drug & Alcohol Dependence*. 214:108167, 2020 Jul 10.

[Journal Article]

UI: 32679521

**Authors Full Name**

Biello, Katie; Salhaney, Peter; Valente, Pablo K; Childs, Ellen; Olson, Jennifer; Earlywine, Joel J; Marshall, Brandon D; R Bazzi, Angela.

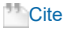

---
